# Supplementary material for: Nigral ATP13A2 depletion induces Parkinson's disease-related neurodegeneration in non-human primates
Source: Research Square preprint supplement (doi:10.21203/rs.3.rs-3845030/v1), 2024-01-22
Supplement: Supplementary file 1 [file 5394d5eaa4fe12d17a77d0f9.xlsx]

## Sheet: Fig. 1A
Animal_ID	Group	Values
1	Control	130029
2	Control	123377
3	Control	148173
4	Control	162083
5	Control	127004
6	Control	155432
7	shATP13A2	97775
8	shATP13A2	100599
9	shATP13A2	84874
10	shATP13A2	122573
p=0.00255, t=3.814

## Sheet: Fig. 1B
TH Putamen					TH Caudate nucleus
Animal_ID	Group	Values			Animal_ID	Group	Values
1	Control	96.7379			1	Control	97.1723
2	Control	112.196			2	Control	100.151
3	Control	81.6393			3	Control	90.4169
4	Control	109.427			4	Control	112.26
5	shATP13A2	73.4537			5	shATP13A2	81.2307
6	shATP13A2	66.6833			6	shATP13A2	82.4985
7	shATP13A2	36.3326			7	shATP13A2	54.2631
8	shATP13A2	41.1801			8	shATP13A2	58.5634
p=0.0038, t=3.947					p=0.00605, t=3.548
AADC Putamen					AADC Caudate nucleus
Animal_ID	Group	Values			Animal_ID	Group	Values
1	Control	100.354			1	Control	104.833
2	Control	104.68			2	Control	105.546
3	Control	96.7725			3	Control	100.804
4	Control	98.1943			4	Control	88.8172
5	shATP13A2	37.8746			5	shATP13A2	47.3907
6	shATP13A2	35.6336			6	shATP13A2	44.2643
7	shATP13A2	12.2927			7	shATP13A2	30.7506
8	shATP13A2	12.8063			8	shATP13A2	27.7308
p=0.0001, t=10.45					p=0.0001, t=10.04
DAT Putamen					DAT Caudate nucleus
Animal_ID	Group	Values			Animal_ID	Group	Values
1	Control	105.387			1	Control	102.12
2	Control	77.8765			2	Control	92.8418
3	Control	115.797			3	Control	103.638
4	Control	100.939			4	Control	101.4
5	shATP13A2	42.9421			5	shATP13A2	42.2449
6	shATP13A2	41.8504			6	shATP13A2	48.5415
7	shATP13A2	95.4637			7	shATP13A2	84.6702
8	shATP13A2	93.0208			8	shATP13A2	85.6076
p=0.0557, t=1.866					p=0.0129, t=2.944

## Sheet: Fig. 2A
Animal_ID	Group	Values
1	Control	103.977
2	Control	86.2362
3	Control	115.185
4	Control	94.6024
5	shATP13A2	58.6272
6	shATP13A2	89.832
7	shATP13A2	112.374
8	shATP13A2	85.1358
p=0.16355, t=1.067

## Sheet: Fig 2B
Animal_ID	Group	Values
1	Control	122.626
2	Control	46.5767
3	Control	201.284
4	Control	29.5137
5	shATP13A2	178.25
6	shATP13A2	258.041
7	shATP13A2	409.372
8	shATP13A2	401.149
p=0.0109, t=3.077

## Sheet: Fig. 2C
DB Syn 211
Animal_ID	Group	Values
1	Control	87.9441
2	Control	107.481
3	Control	104.575
4	shATP13A2	107.272
5	shATP13A2	132.691
6	shATP13A2	137.23
7	shATP13A2	107.603
p=0.0528, t=1.972
DB pSyn
Animal_ID	Group	Values
1	Control	94.9557
2	Control	93.0361
3	Control	112.008
4	shATP13A2	555.18
5	shATP13A2	531.052
6	shATP13A2	446.136
7	shATP13A2	475.264
p=0.0001, t=13.39

## Sheet: Fig. 3A LAMP2
Average number of LAMP2 puncta by whole TH cell area						LAMP2 puncta area in whole cell (µm2)
Animal_ID	Group	Values				Animal_ID	Group	Values
1	Control	7.69				1	Control	1.47823
2	Control	4.98				2	Control	2.34203
3	Control	6.79				3	Control	1.68919
4	Control	5.18				4	Control	2.12903
5	Control	6.75				5	Control	1.60233
6	Control	4.55				6	Control	2.25265
7	shATP13A2	8.36				7	shATP13A2	1.86873
8	shATP13A2	13.36				8	shATP13A2	1.22845
9	shATP13A2	8.26				9	shATP13A2	2.07307
p=0.0099, t=3.004						p=0.2547, t=0.6951
Average number of LAMP2 puncta by perinuclear TH cell area						Perinuclear LAMP2 puncta area (µm2)
Animal_ID	Group	Values				Animal_ID	Group	Values
1	Control	8.02				1	Control	1.49743
2	Control	5.04				2	Control	2.35321
3	Control	7.46				3	Control	1.69337
4	Control	5.47				4	Control	2.13843
5	Control	7.03				5	Control	1.59169
6	Control	5.12				6	Control	2.25938
7	shATP13A2	10.11				7	shATP13A2	1.89377
8	shATP13A2	14.89				8	shATP13A2	1.23213
9	shATP13A2	9.22				9	shATP13A2	2.06639
p=0.0042, t=3.631						p=0.256, t=0.6907
Average number of LAMP2 puncta by cytosolic TH cell area						Cytosolic LAMP2 puncta area (µm2)
Animal_ID	Group	Values				Animal_ID	Group	Values
1	Control	7.87				1	Control	1.47002
2	Control	5.26				2	Control	2.35858
3	Control	6.88				3	Control	1.68933
4	Control	5.43				4	Control	2.12525
5	Control	6.96				5	Control	1.60953
6	Control	4.64				6	Control	2.24454
7	shATP13A2	8.24				7	shATP13A2	1.88416
8	shATP13A2	13.15				8	shATP13A2	1.23466
9	shATP13A2	8.08				9	shATP13A2	2.05761
p=0.0139, t=2.768						p=0.25605, t=0.6905

## Sheet: Fig. 3B LC3
Average number of LC3 puncta by whole TH cell area						LC3 puncta area in whole cell (µm2)
Animal_ID	Group	Values				Animal_ID	Group	Values
1	Control	5.31				1	Control	2.01383
2	Control	5.16				2	Control	2.04285
3	Control	4.37				3	Control	2.19437
4	Control	5.14				4	Control	1.5653
5	Control	4.7				5	Control	1.7951
6	Control	5.14				6	Control	1.73285
7	shATP13A2	4.72				7	shATP13A2	2.52004
8	shATP13A2	5.7				8	shATP13A2	1.94703
9	shATP13A2	6.86				9	shATP13A2	3.79448
10	shATP13A2	7.74				10	shATP13A2	3.22099
p=0.02435, t=2.322						p=0.01025, t=2.880
Average number of LC3 puncta by perinuclear TH cell area						Perinuclear LC3 puncta area (µm2)
Animal_ID	Group	Values				Animal_ID	Group	Values
1	Control	5.87				1	Control	2.0275
2	Control	5.34				2	Control	2.05204
3	Control	4.19				3	Control	2.20492
4	Control	5.35				4	Control	1.56894
5	Control	5.06				5	Control	1.8013
6	Control	5.26				6	Control	1.73857
7	shATP13A2	5.46				7	shATP13A2	2.53387
8	shATP13A2	5.95				8	shATP13A2	1.95584
9	shATP13A2	7.79				9	shATP13A2	3.80242
10	shATP13A2	9.53				10	shATP13A2	3.22304
p=0.0172, t=2.546						p=0.01025, t=2.882
Average number of LC3 puncta by cytosolic TH cell area						Cytosolic LC3 puncta area (µm2)
Animal_ID	Group	Values				Animal_ID	Group	Values
1	Control	5.45				1	Control	2.02348
2	Control	5.47				2	Control	2.04077
3	Control	4.72				3	Control	2.19066
4	Control	5.4				4	Control	1.56851
5	Control	4.86				5	Control	1.79619
6	Control	5.45				6	Control	1.73735
7	shATP13A2	4.74				7	shATP13A2	2.52855
8	shATP13A2	5.91				8	shATP13A2	1.9576
9	shATP13A2	6.87				9	shATP13A2	3.7822
10	shATP13A2	7.51				10	shATP13A2	3.17785
p=0.0382, t=2.034						p=0.00995, t=2.900

## Sheet: Fig. 4
Iron				Zinc
Animal_ID	Group	Values		Animal_ID	Group	Values
1	Control	66		1	Control	13.9
2	Control	88		2	Control	10.8
3	Control	41		3	Control	10.5
4	shATP13A2	296		4	shATP13A2	17
5	shATP13A2	292		5	shATP13A2	15
6	shATP13A2	350		6	shATP13A2	12
7	shATP13A2	506		7	shATP13A2	11.8
p=0.0022, t=4.908				p=0.1292, t=1.275
Copper				Calcium
Animal_ID	Group	Values		Animal_ID	Group	Values
1	Control	15.3		1	Control	57
2	Control	12		2	Control	30
3	Control	13		3	Control	40
4	shATP13A2	9.6		4	shATP13A2	82
5	shATP13A2	8.7		5	shATP13A2	38
6	shATP13A2	6.7		6	shATP13A2	61
7	shATP13A2	6.8		7	shATP13A2	47
p=0.0028, t=4.644				p=0.15715, t=1.118
Manganese				Sulfur
Animal_ID	Group	Values		Animal_ID	Group	Values
1	Control	0.7		1	Control	304
2	Control	0.6		2	Control	256
3	Control	0.57		3	Control	235
4	shATP13A2	1		4	shATP13A2	380
5	shATP13A2	0.96		5	shATP13A2	348
6	shATP13A2	1		6	shATP13A2	339
7	shATP13A2	1.2		7	shATP13A2	344
p=0.0011, t=5.785				p=0.0038, t=4.322

## Sheet: Fig S1C
Animal_ID	Group	Values
1	Control	42.051
2	Control	111.521
3	Control	146.428
4	shATP13A2	101.678
5	shATP13A2	10.6783
6	shATP13A2	29.3895
7	shATP13A2	22.5021
p=0.07825, t=1.666

## Sheet: Fig S3
Control	shATP13A2
30	27
22	17
12	15
14	10
3	13
7	7
4	17
5	29
13	19
25	20
10	8
11	3
6	3
14	38
10	15
3	45
12	31
27	18
2	19
15	9
10	7
39	12
10	24
15	16
11	21
9	28
9	9
5	18
17	23
30	18
17	25
4	31
6	21
3	15
	5
	38
	8
	9
	30
	11
	13
	14
	15
	17
	10
	16
	6
	7
p=0.01455, t=2.222
